# Supplementary material for: Metallo-supramolecular grid-type architectures for highly and selectively efficient adsorption of dyes in water
Source: Royal Society of Chemistry journal article supplement (doi:10.1039/c5ra02183a), 2015-01-01
Supplement: c5ra02183a1.pdf [file c5ra02183a1.pdf]

## Metallo-supramolecular grid-type architectures for highly and selectively efficient adsorption of dyes in water

Xiaoting Qin, Guonan Zhang, Yanfei Gao, Houting Liu, Chunfang Du, Zhiliang Liu\*

*Key Lab of Nanoscience and Nanotechnology, College of Chemistry and Chemical Engineering, Inner Mongolia University, Hohhot, 010021, P. R. China*

\*Corresponding author. Tel: +86-471-4995414 Fax: +86-471-4992147

E-mail addresses: [cezliu@imu.edu.cn](mailto:cezliu@imu.edu.cn)

### X-ray crystallography

Structure determination was performed on a Bruker ApexII CCD diffractometer equipped with graphite-monochromatic Mo-K $\alpha$  radiation ( $\lambda = 0.71073 \text{ \AA}$ ) at 293K. Empirical absorption corrections were applied using the SADABS program<sup>1</sup>. The structure of **1** and **2** was solved by direct methods and refined anisotropically by full-matrix least squares techniques on  $F^2$  values, using the SHELX-97 program<sup>2</sup>. Hydrogen atoms were added on appropriate positions in theory and refined with isotropic thermal parameters riding on those parent atoms. The corresponding crystallographic and refinement data for **1** and **2** are listed in Table S1.

Table S1. Crystallographic data and structure refinements for complexes **1** and **2**.

|                                                   | <b>1</b>                                                                                        | <b>2</b>                                                                                           |
|---------------------------------------------------|-------------------------------------------------------------------------------------------------|----------------------------------------------------------------------------------------------------|
| Empirical formula                                 | Cu <sub>5.5</sub> C <sub>60</sub> H <sub>49</sub> I <sub>2</sub> N <sub>27</sub> O <sub>5</sub> | Cu <sub>15</sub> C <sub>191</sub> H <sub>111</sub> Cl <sub>6</sub> N <sub>89</sub> O <sub>24</sub> |
| Formula weight                                    | 1831.53                                                                                         | 5202.49                                                                                            |
| Temperature/K                                     | 293(2)                                                                                          | 293(2)                                                                                             |
| Crystal system                                    | monoclinic                                                                                      | triclinic                                                                                          |
| Space group                                       | <i>C2/c</i>                                                                                     | <i>P</i> -1                                                                                        |
| <i>a</i> /Å                                       | 25.089(2)                                                                                       | 18.962(10)                                                                                         |
| <i>b</i> /Å                                       | 19.3049(14)                                                                                     | 22.560(12)                                                                                         |
| <i>c</i> /Å                                       | 30.127(3)                                                                                       | 26.860(14)                                                                                         |
| $\alpha$ /°                                       | 90.00                                                                                           | 105.080(7)                                                                                         |
| $\beta$ /°                                        | 113.501(11)                                                                                     | 102.600(7)                                                                                         |
| $\gamma$ /°                                       | 90.00                                                                                           | 98.885(8)                                                                                          |
| Volume/Å <sup>3</sup>                             | 13382(2)                                                                                        | 10552(10)                                                                                          |
| <i>Z</i>                                          | 8                                                                                               | 1                                                                                                  |
| $\rho_{\text{calc}}/\text{mg}\cdot\text{mm}^{-3}$ | 1.818                                                                                           | 1.637                                                                                              |

|                                                |                                                                                                |                                                                                                |
|------------------------------------------------|------------------------------------------------------------------------------------------------|------------------------------------------------------------------------------------------------|
| m/mm <sup>-1</sup>                             | 2.712                                                                                          | 1.641                                                                                          |
| F(000)                                         | 7228.0                                                                                         | 5218.0                                                                                         |
| Theta range/°                                  | 5.14 to 50.04°                                                                                 | 1.64 to 57.66°                                                                                 |
| Index ranges( <i>h</i> , <i>k</i> , <i>l</i> ) | -29 ≤ <i>h</i> ≤ 29,<br>-22 ≤ <i>k</i> ≤ 22,<br>-35 ≤ <i>l</i> ≤ 35                            | -25 ≤ <i>h</i> ≤ 25,<br>-30 ≤ <i>k</i> ≤ 30,<br>-35 ≤ <i>l</i> ≤ 35                            |
| Reflections collected                          | 43158                                                                                          | 147484                                                                                         |
| Independent reflections                        | 11794[R(int) = 0.1555]                                                                         | 53368[R(int) = 0.0594]                                                                         |
| Data/restraints/parameters                     | 11794/2862/903                                                                                 | 53368/12642/3029                                                                               |
| Goodness-of-fit on F <sup>2</sup>              | 1.029                                                                                          | 1.113                                                                                          |
| Final <i>R</i> indexes [I ≥ 2σ (I)]            | <i>R</i> <sub>1</sub> <sup>a)</sup> = 0.1120, <i>wR</i> <sub>2</sub> <sup>b)</sup> =<br>0.2648 | <i>R</i> <sub>1</sub> <sup>a)</sup> = 0.0943, <i>wR</i> <sub>2</sub> <sup>b)</sup> =<br>0.2714 |
| Final <i>R</i> indexes [all data]              | <i>R</i> <sub>1</sub> = 0.1670, <i>wR</i> <sub>2</sub> = 0.3101                                | <i>R</i> <sub>1</sub> = 0.1832, <i>wR</i> <sub>2</sub> = 0.3493                                |

a)  $R = \frac{\sum ||F_o| - |F_c||}{\sum |F_o|}$ , b)  $wR = \frac{[\sum [w(F_o^2 - F_c^2)^2]]^{1/2}}{[\sum (wF_o^2)^2]^{1/2}}$

Table S2. Selected bond lengths /Å and bond angles /° for complex **1**.

|               |           |              |           |
|---------------|-----------|--------------|-----------|
| Cu1-N4        | 2.006(11) | Cu4-N11      | 1.963(11) |
| Cu1-N5        | 2.003(11) | Cu4-N22      | 2.008(11) |
| Cu1-N6        | 1.991(11) | Cu4-N23      | 2.002(10) |
| Cu1-N16A      | 1.972(11) | Cu4-N24      | 2.029(11) |
| Cu1-N18A      | 2.365(12) | Cu5-N26      | 1.971(11) |
| Cu2-N8        | 1.955(11) | Cu5-N26A     | 1.971(11) |
| Cu2-N9        | 2.120(12) | Cu5-N27      | 2.087(12) |
| Cu2-N19       | 2.110(12) | Cu5-N27A     | 2.087(12) |
| Cu2-N20       | 1.971(11) | Cu6-I1       | 2.509(2)  |
| Cu3-N13       | 2.055(11) | Cu6-I2B      | 2.578(2)  |
| Cu3-N13A      | 2.055(11) | Cu6-I2       | 2.561(2)  |
| Cu3-N14       | 2.104(11) | Cu7-N1       | 2.128(11) |
| Cu3-N14A      | 2.104(11) | Cu7-N1A      | 2.128(11) |
| Cu3-N15       | 2.080(11) | Cu7-N2       | 1.951(11) |
| Cu3-N15A      | 2.080(11) | Cu7-N2A      | 1.951(11) |
| Cu4-N10       | 2.422(12) |              |           |
| N4-Cu1-N18A   | 100.1(4)  | N23-Cu4-N24  | 77.6(4)   |
| N5-Cu1-N4     | 78.1(5)   | N24-Cu4-N10  | 99.8(4)   |
| N5-Cu1-N18A   | 123.2(4)  | N26A-Cu5-N26 | 132.9(7)  |
| N6-Cu1-N5     | 78.3(4)   | N26-Cu5-N27  | 81.8(5)   |
| N6-Cu1-N18A   | 96.5(4)   | N26A-Cu5-N27 | 125.2(4)  |
| N16A-Cu1-N4   | 99.9(4)   | N26-Cu5-N27A | 125.2(4)  |
| N16A-Cu1-N6   | 101.1(4)  | N27A-Cu5-N27 | 114.3(7)  |
| N16A-Cu1-N18A | 75.0(4)   | I1-Cu6-I2B   | 118.73(8) |

|               |          |              |           |
|---------------|----------|--------------|-----------|
| N8-Cu2-N9     | 81.1(5)  | I1-Cu6-I2    | 123.72(8) |
| N8-Cu2-N19    | 123.2(5) | I2-Cu6-I2B   | 117.47(7) |
| N8-Cu2-N20    | 138.4(4) | N1-Cu7-N1A   | 120.5(7)  |
| N19-Cu2-N9    | 113.8(4) | N2-Cu7-N1A   | 121.2(4)  |
| N20-Cu2-N9    | 122.1(5) | N2A-Cu7-N1   | 121.2(4)  |
| N20-Cu2-N19   | 81.4(4)  | N2-Cu7-N1    | 81.0(4)   |
| N13A-Cu3-N13  | 93.9(6)  | N2-Cu7-N2A   | 137.2(7)  |
| N13A-Cu3-N14  | 105.0(4) | N23-Cu4-N22  | 77.6(4)   |
| N13-Cu3-N14   | 75.6(4)  | N23-Cu4-N24  | 99.8(4)   |
| N13-Cu3-N14A  | 105.0(4) | N24-Cu4-N10  | 132.9(7)  |
| N13A-Cu3-N14A | 75.6(4)  | N26A-Cu5-N26 | 81.8(5)   |
| N13A-Cu3-N15  | 92.6(4)  | N26-Cu5-N27  | 125.2(4)  |
| N13-Cu3-N15A  | 92.6(4)  | N26A-Cu5-N27 | 125.2(4)  |
| N15A-Cu3-N14A | 75.9(4)  | N26-Cu5-N27A | 114.3(7)  |
| N15-Cu3-N14A  | 103.6(4) | N27A-Cu5-N27 | 118.73(8) |
| N15-Cu3-N14   | 75.9(4)  | I1-Cu6-I2B   | 123.72(8) |
| N15A-Cu3-N14  | 103.6(4) | I1-Cu6-I2    | 117.47(7) |
| N15-Cu3-N15A  | 94.8(6)  | I2-Cu6-I2B   | 120.5(7)  |
| N11-Cu4-N10   | 73.1(4)  | N1-Cu7-N1A   | 121.2(4)  |
| N11-Cu4-N22   | 100.6(4) | N2-Cu7-N1A   | 121.2(4)  |
| N11-Cu4-N24   | 101.0(4) | N2A-Cu7-N1   | 81.0(4)   |
| N22-Cu4-N10   | 96.0(4)  | N2-Cu7-N1    | 137.2(7)  |
| N23-Cu4-N10   | 124.8(4) | N2-Cu7-N2A   | 77.6(4)   |

Symmetry transformations used to generate equivalent atoms: A  $1-x, +y, 1/2-z$ ; B  $1/2-x, 3/2-y, 1-z$ .

Table S3 The BVS calculation result of complex 1

| Cu site | Cu <sup>I</sup> | Cu <sup>II</sup> |
|---------|-----------------|------------------|
| Cu1     | 1.490           | <u>2.271</u>     |
| Cu2     | <u>1.231</u>    | 1.876            |
| Cu3     | 1.622           | <u>2.472</u>     |
| Cu4     | 1.447           | <u>2.205</u>     |
| Cu5     | <u>1.254</u>    | 1.910            |
| Cu6     | <u>0.913</u>    | 1.134            |
| Cu7     | <u>1.238</u>    | 1.886            |

Table S4 Selected bond lengths /Å and bond angles /° for complex 2.

|        |          |         |          |
|--------|----------|---------|----------|
| Cu1-N2 | 1.954(6) | Cu4-N33 | 2.016(6) |
| Cu1-O6 | 2.354(7) | Cu5-N22 | 2.131(6) |

---

|              |          |             |          |
|--------------|----------|-------------|----------|
| Cu1-N19A     | 2.027(6) | Cu5-N23     | 1.952(6) |
| Cu1-N20A     | 1.953(6) | Cu5-N24     | 2.001(6) |
| Cu1A-N19     | 2.027(6) | Cu5-N35     | 1.942(6) |
| Cu1A-N20     | 1.953(6) | Cu5-N36     | 2.273(7) |
| Cu2-N10      | 2.055(6) | Cu6-N25     | 1.999(6) |
| Cu2-N11      | 1.919(6) | Cu6-N27     | 2.229(6) |
| Cu2-N10A     | 2.055(6) | Cu6-N44     | 1.954(6) |
| Cu2-N11A     | 1.919(6) | Cu6-N45     | 2.329(7) |
| Cu3-N4       | 2.041(6) | Cu7-N16     | 1.924(6) |
| Cu3-N5       | 1.992(6) | Cu7-N18     | 2.376(6) |
| Cu3-N6       | 1.985(5) | Cu7-N40     | 1.991(7) |
| Cu3-N28      | 2.299(6) | Cu7-N41     | 1.981(6) |
| Cu3-N29      | 1.968(6) | Cu7-N42     | 1.983(7) |
| Cu4-N14      | 2.072(6) | Cu8-N8      | 1.968(6) |
| Cu4-N15      | 2.233(6) | Cu8-N9      | 2.133(6) |
| Cu4-N31      | 2.055(6) | Cu8-N37     | 2.144(8) |
| Cu4-N32      | 1.993(6) | Cu8-N38     | 1.962(7) |
|              |          |             |          |
| N1-Cu1-O6    | 86.1(3)  | N22-Cu5-N36 | 97.6(2)  |
| N2-Cu1-N1    | 81.5(2)  | N23-Cu5-N22 | 80.6(2)  |
| N2-Cu1-N19A  | 98.9(3)  | N23-Cu5-N24 | 79.5(2)  |
| N2-Cu1-O6    | 97.4(3)  | N23-Cu5-N36 | 119.1(3) |
| N19A-Cu1-O6  | 89.6(3)  | N24-Cu5-N36 | 98.5(3)  |
| N20A-Cu1-N1  | 99.4(3)  | N35-Cu5-N22 | 101.3(2) |
| N20A-Cu1-O6  | 92.4(3)  | N35-Cu5-N24 | 95.6(2)  |
| N11A-Cu2-N10 | 99.2(2)  | N35-Cu5-N36 | 77.4(3)  |
| N11-Cu2-N10  | 80.8(2)  | N25-Cu6-N27 | 79.0(2)  |
| N11-Cu2-N10A | 99.2(2)  | N25-Cu6-N45 | 116.8(3) |
| N4-Cu3-N28   | 105.7(2) | N27-Cu6-N45 | 116.9(3) |
| N5-Cu3-N4    | 80.0(2)  | N44-Cu6-N27 | 121.4(3) |
| N5-Cu3-N28   | 128.6(2) | N44-Cu6-N45 | 76.6(3)  |
| N6-Cu3-N5    | 78.3(2)  | N16-Cu7-N18 | 75.4(2)  |
| N6-Cu3-N28   | 90.0(2)  | N16-Cu7-N40 | 100.8(3) |
| N29-Cu3-N4   | 100.8(2) | N16-Cu7-N42 | 99.3(3)  |
| N29-Cu3-N6   | 97.6(2)  | N40-Cu7-N18 | 97.3(3)  |
| N29-Cu3-N28  | 76.2(2)  | N41-Cu7-N18 | 117.5(2) |
| N14-Cu4-N15  | 77.0(2)  | N41-Cu7-N40 | 78.1(3)  |
| N31-Cu4-N14  | 102.3(2) | N41-Cu7-N42 | 79.1(3)  |
| N31-Cu4-N15  | 90.4(2)  | N42-Cu7-N18 | 101.4(3) |
| N32-Cu4-N15  | 96.2(2)  | N8-Cu8-N9   | 80.7(2)  |
| N32-Cu4-N31  | 78.1(2)  | N8-Cu8-N37  | 128.9(3) |
| N32-Cu4-N33  | 77.6(3)  | N9-Cu8-N37  | 100.1(3) |
| N33-Cu4-N14  | 102.6(2) | N38-Cu8-N9  | 115.5(3) |
| N33-Cu4-N15  | 98.3(2)  | N38-Cu8-N37 | 79.9(3)  |

---

Symmetry transformations used to generate equivalent atoms: A - x, 1- y, 1- z.

### Dye adsorption experiments of complex 1

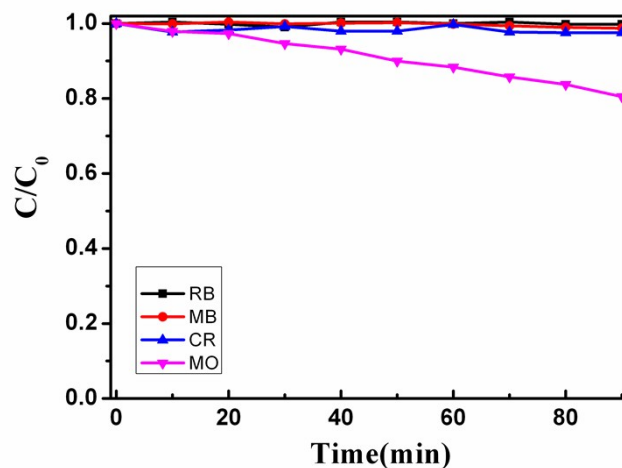

Figure.S1 Concentration changes of MB, RB, MO, and CR with time in the presence of 1

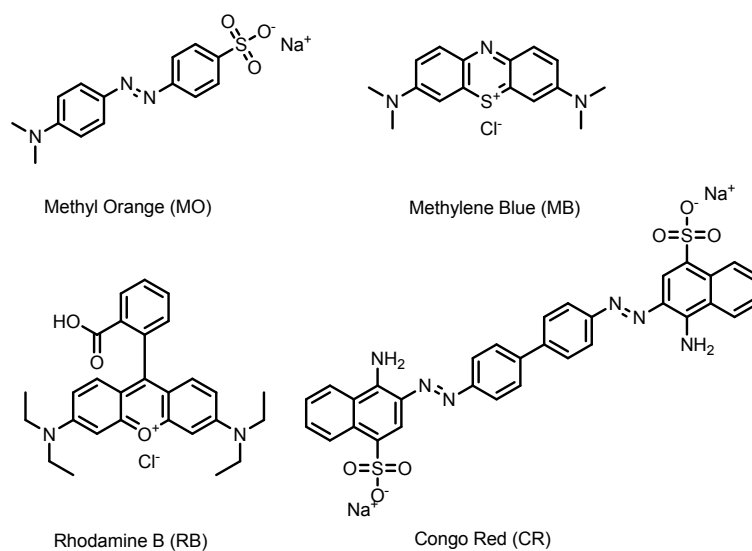

Figure S3 Molecular structure of selected dyes.

1. WI, Bruker Analytical X - ray Systems, Inc.: Madison, 1998.
2. G. M. Sheldrick, *Acta Crystallogr A*, 2008, **64**, 112-122.

We also provide the IR spectra of complex 2, complex 2 loaded with MO and MO, respectively (Figure S3). Although the difference of IR spectra before and after adsorption is unobvious, due to the fact that the typical absorption peaks of complex 2 and MO (such as C=N groups of complex 2 at about 1600 cm<sup>-1</sup> and N=N of MO molecules at the same position) overlap each other, the slight changes of some peaks at 1600, 1100 and 1000 cm<sup>-1</sup> can serve as an

auxiliary evidence of the adsorption process.

## IR spectra data

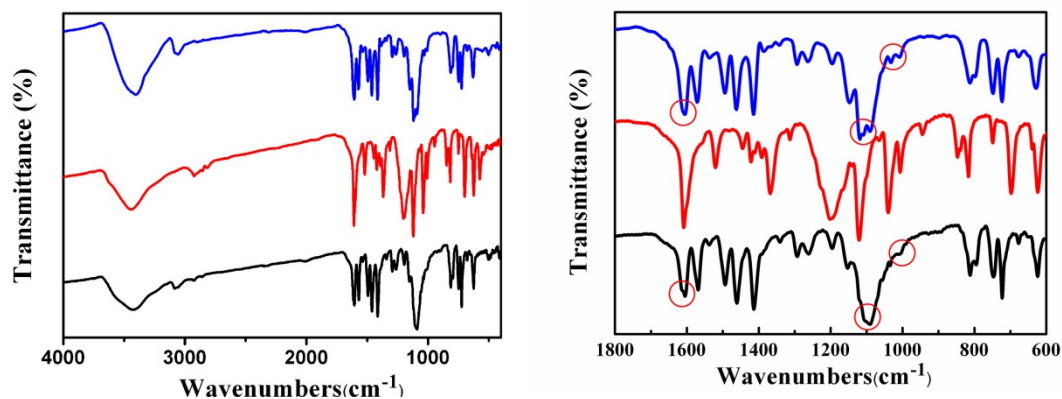

Figure.S3 IR spectra of **2** (black), MO (red) and **2** loaded with MO (blue)

Table S5 The BVS calculation result of complex **2**

| Cu site | Cu <sup>I</sup> | Cu <sup>II</sup> |
|---------|-----------------|------------------|
| Cu1     | 1.891           | <u>2.845</u>     |
| Cu2     | 1.410           | <u>2.150</u>     |
| Cu3     | 1.505           | <u>2.292</u>     |
| Cu4     | 1.403           | <u>2.141</u>     |
| Cu5     | 1.501           | <u>2.289</u>     |
| Cu6     | <u>1.033</u>    | 1.575            |
| Cu7     | 1.577           | <u>2.406</u>     |
| Cu8     | <u>1.197</u>    | 1.823            |
